# Supplementary material for: Growth hormone secretion is diminished and tightly controlled in humans enriched for familial longevity
Source: PubMed Central journal article supplement (PMC6398524; doi:10.1111/acel.12519), 2016-09-07
Supplement: ACEL-15-1126-s001.pdf [file ACEL-15-1126-s001.pdf]

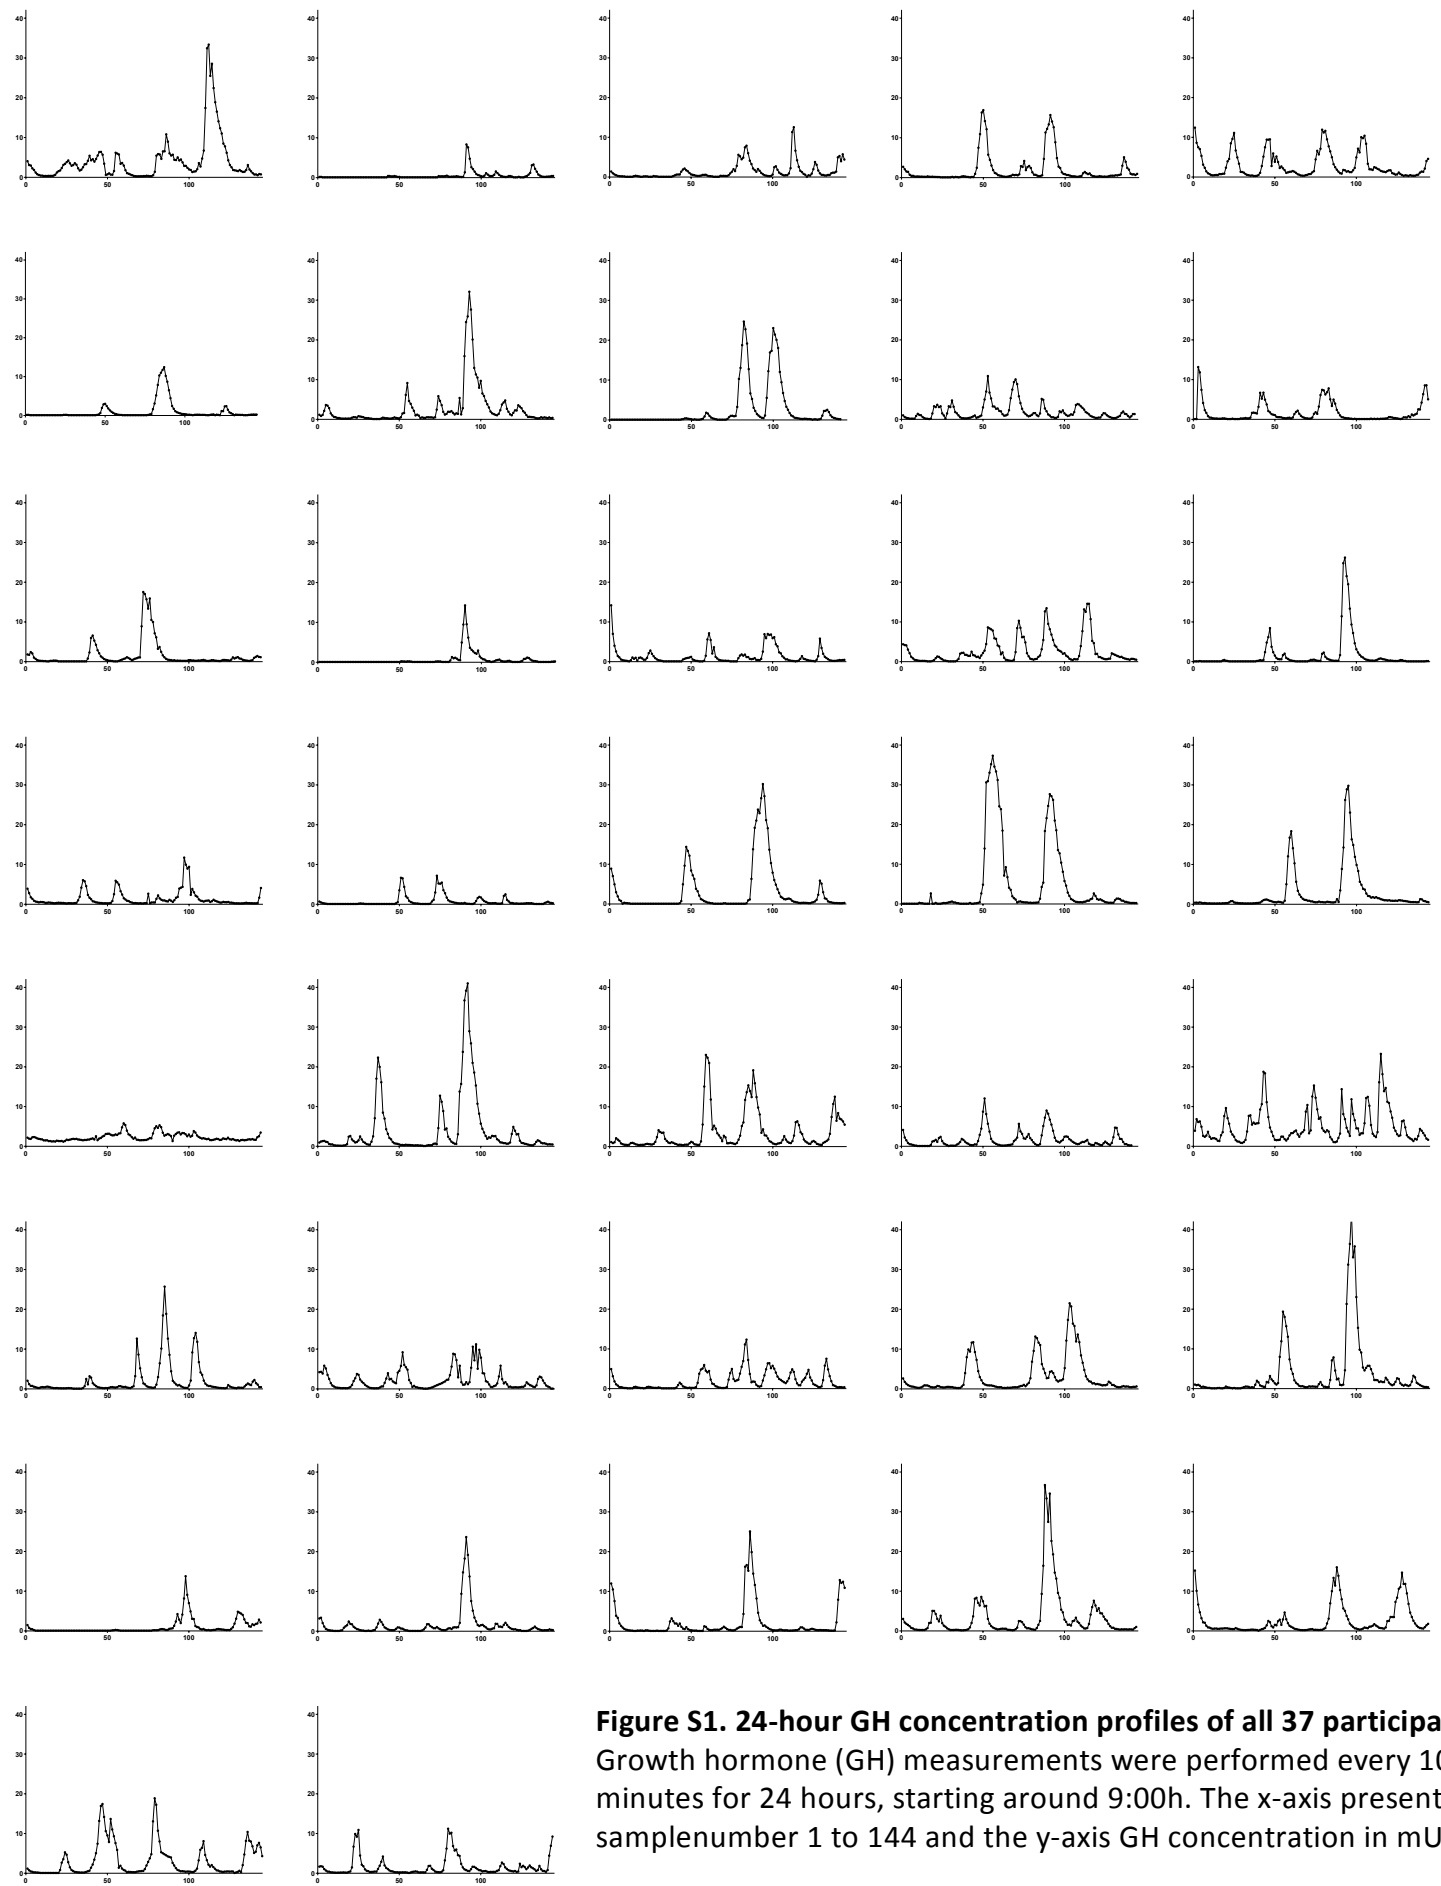

**Figure S1. 24-hour GH concentration profiles of all 37 participants**  
 Growth hormone (GH) measurements were performed every 10 minutes for 24 hours, starting around 9:00h. The x-axis presents samplenum 1 to 144 and the y-axis GH concentration in mU/L.
